# Supplementary material for: Targeting HIV-1 RNase H: N’-(2-Hydroxy-benzylidene)-3,4,5-Trihydroxybenzoylhydrazone as Selective Inhibitor Active against NNRTIs-Resistant Variants
Source: PubMed Central journal article supplement (PMC7412550; doi:10.3390/v12070729), 2020-07-06
Supplement: viruses-12-00729-s001.pdf [file viruses-12-00729-s001.pdf]

Supplementary material

# Targeting HIV-1 RNase H: *N'*-(2-Hydroxybenzylidene)-3,4,5-Trihydroxybenzoylhydrazone as Selective Inhibitor Active against NNRTIs-Resistant Variants

Angela Corona <sup>1,\*</sup>, Ester Ballana <sup>2</sup>, Simona Distinto <sup>1</sup>, Dominga Rogolino <sup>3</sup>, Claudia Del Vecchio <sup>4</sup>, Mauro Carcelli <sup>3</sup>, Roger Badia <sup>2</sup>, Eva Riveira-Muñoz <sup>2</sup>, Francesca Esposito <sup>1</sup>, Cristina Parolin <sup>4</sup>, José A. Esté <sup>2,5</sup>, Nicole Grandi <sup>1</sup> and Enzo Tramontano <sup>1,6</sup>

<sup>1</sup> Department of Life and Environmental Sciences University of Cagliari, Cittadella Universitaria di Monserrato, 09042 Monserrato, Italy

<sup>2</sup> AIDS Research Institute – IrsiCaixa, 08916 Badalona, Spain

<sup>3</sup> Department of Chemistry, Life Sciences and Environmental Sustainability, University of Parma, 43124 Parma, Italy

<sup>4</sup> Department of Molecular Medicine, University of Padova, 35122 Padova, Italy

<sup>5</sup> CienciaTraducida, 08391 Barcelona, Spain

<sup>6</sup> Istituto di Ricerca Genetica e Biomedica, Consiglio Nazionale delle Ricerche (CNR), 09042 Monserrato, Cagliari, Italy

\* Correspondence: angela.corona@unica.it; Tel.: +39-070-6754530

**Table S1.** Percentage of conservation of the amino acid residue in the corresponding position.

| HIV-1 RT position | Amino acid | % of conservation |
|-------------------|------------|-------------------|
| 427               | Y          | 100.00            |
| 428               | Q          | 100.00            |
| 429               | L          | 99.90             |
| 430               | E          | 99.80             |
| 431               | K          | 96.20             |
| 432               | E          | 77.00             |
| 433               | P          | 100.00            |
| 434               | I          | 98.20             |
| 435               | V          | 35.60             |
| 436               | G          | 95.60             |
| 437               | A          | 84.00             |
| 438               | E          | 99.90             |
| 439               | T          | 99.90             |
| 440               | F          | 99.30             |
| 441               | Y          | 99.90             |
| 442               | V          | 100.00            |
| 443               | D          | 99.80             |
| 444               | G          | 99.90             |
| 445               | A          | 100.00            |
| 446               | A          | 93.90             |
| 447               | S          | 9.00              |
| 448               | R          | 96.70             |
| 449               | E          | 95.40             |
| 450               | T          | 97.70             |
| 451               | K          | 98.20             |
| 452               | L          | 59.60             |
| 453               | G          | 99.80             |

|     |   |        |
|-----|---|--------|
| 454 | K | 95.90  |
| 455 | A | 100.00 |
| 456 | G | 99.90  |
| 457 | Y | 100.00 |
| 458 | V | 98.20  |
| 459 | T | 99.90  |
| 460 | N | 11.20  |
| 461 | R | 79.50  |
| 462 | G | 99.90  |
| 463 | R | 97.20  |
| 464 | Q | 99.60  |
| 465 | K | 98.40  |
| 466 | V | 67.10  |
| 467 | V | 75.70  |
| 468 | T | 12.10  |
| 469 | L | 91.00  |
| 470 | T | 87.20  |
| 471 | D | 47.50  |
| 472 | T | 99.90  |
| 473 | T | 100.00 |
| 474 | N | 99.90  |
| 475 | Q | 100.00 |
| 476 | K | 95.70  |
| 477 | T | 76.10  |
| 478 | E | 99.80  |
| 479 | L | 100.00 |
| 480 | Q | 82.90  |
| 481 | A | 100.00 |
| 482 | I | 99.50  |
| 483 | H | 36.30  |
| 484 | L | 98.00  |
| 485 | A | 100.00 |
| 486 | L | 100.00 |
| 487 | Q | 99.80  |
| 488 | D | 99.80  |
| 489 | S | 99.90  |
| 490 | G | 100.00 |
| 491 | L | 37.80  |
| 492 | E | 98.90  |
| 493 | V | 99.60  |
| 494 | N | 100.00 |
| 495 | I | 98.40  |
| 496 | V | 99.40  |
| 497 | T | 100.00 |
| 498 | D | 100.00 |
| 499 | S | 99.90  |
| 500 | Q | 99.90  |
| 501 | Y | 99.90  |
| 502 | A | 97.40  |
| 503 | L | 99.70  |
| 504 | G | 99.90  |
| 505 | I | 99.70  |

|     |   |        |
|-----|---|--------|
| 506 | I | 99.90  |
| 507 | Q | 98.80  |
| 508 | A | 97.60  |
| 509 | Q | 95.60  |
| 510 | P | 100.00 |
| 511 | D | 99.90  |
| 512 | Q | 2.90   |
| 513 | S | 99.90  |
| 514 | E | 96.40  |
| 515 | S | 99.10  |
| 516 | E | 96.70  |
| 517 | L | 88.80  |
| 518 | V | 99.90  |
| 519 | N | 69.10  |
| 520 | Q | 94.80  |
| 521 | I | 99.70  |
| 522 | I | 99.90  |
| 523 | E | 99.80  |
| 524 | Q | 83.20  |
| 525 | L | 99.90  |
| 526 | I | 100.00 |
| 527 | K | 67.70  |
| 528 | K | 99.90  |
| 529 | E | 94.30  |
| 530 | K | 60.80  |
| 531 | V | 69.60  |
| 532 | Y | 99.90  |
| 533 | L | 99.80  |
| 534 | A | 37.10  |
| 535 | W | 99.90  |
| 536 | V | 99.90  |
| 537 | P | 99.90  |
| 538 | A | 99.90  |
| 539 | H | 100.00 |
| 540 | K | 99.90  |
| 541 | G | 99.70  |
| 542 | I | 99.50  |
| 543 | G | 96.40  |
| 544 | G | 99.80  |
| 545 | N | 99.90  |
| 546 | E | 99.30  |
| 547 | Q | 96.60  |
| 548 | V | 94.90  |
| 549 | D | 99.70  |
| 550 | K | 99.70  |
| 551 | L | 99.90  |
| 552 | V | 99.90  |
| 553 | S | 99.90  |
| 554 | A | 100.00 |
| 555 | G | 99.70  |
| 556 | I | 99.10  |
| 557 | R | 99.80  |

|     |   |        |
|-----|---|--------|
| 558 | K | 87.00  |
| 559 | I | 7.40   |
| 560 | L | 100.00 |

**Table S2.** Structures and anti-HIV-1 RT RNase H activities of compounds 1–23.

| Compound | Structure                                                                            | HIV-1 RNase H IC <sub>50</sub> (μM) |
|----------|--------------------------------------------------------------------------------------|-------------------------------------|
| 1        | 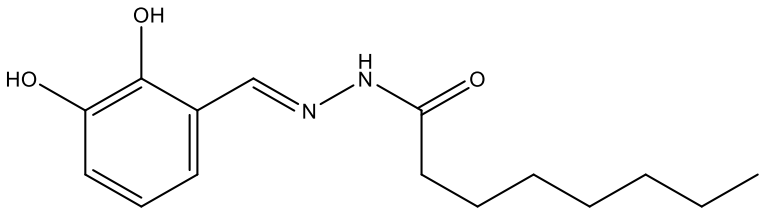   | 61 ± 11                             |
| 2        |    | 62 ± 2                              |
| 3        |   | >100                                |
| 4        |  | >100                                |
| 5        |  | >100                                |
| 6        |  | 37 ± 5                              |

|    |                                                                                      |              |
|----|--------------------------------------------------------------------------------------|--------------|
| 7  | 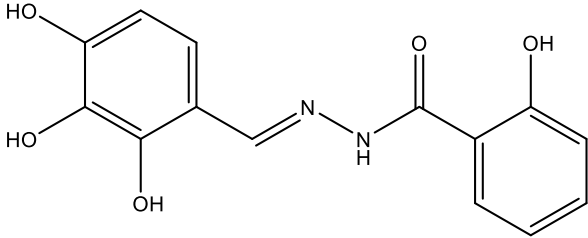   | 25.26 ± 7.56 |
| 8  |    | 8.77 ± 3.13  |
| 9  |     | 9.58 ± 3.43  |
| 10 |   | 4.12 ± 0.22  |
| 11 |  | 2.60 ± 0.59  |
| 12 |  | 3.22 ± 0.54  |
| 13 |  | 2.32 ± 0.75  |

|    |  |                 |
|----|--|-----------------|
| 14 |  | $3.11 \pm 0.47$ |
| 15 |  | $0.92 \pm 0.02$ |
| 16 |  | $2.15 \pm 0.11$ |
| 17 |  | $2.03 \pm 0.59$ |
| 18 |  | $1.73 \pm 0.07$ |
| 19 |  | $>100$          |

|    |  |               |
|----|--|---------------|
| 20 |  | 0.175 ± 0.002 |
| 21 |  | 0.62 ± 0.10   |
| 22 |  | 9.71 ± 1.57   |
| 23 |  | 0.18 ± 0.03   |

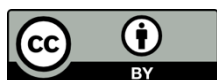

© 2020 by the authors. Submitted for possible open access publication under the terms and conditions of the Creative Commons Attribution (CC BY) license (<http://creativecommons.org/licenses/by/4.0/>).
